# Supplementary material for: CryoEM structure of Drosophila flight muscle thick filaments at 7 Å resolution
Source: PubMed Central journal article supplement (PMC7391215; doi:10.26508/lsa.202000823), 2020-07-27
Supplement: LSA-2020-00823_review_history.pdf [file LSA-2020-00823_review_history.pdf]

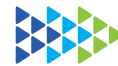

## CryoEM Structure of *Drosophila* Flight Muscle Thick Filaments at 7Å Resolution

Nadia Daneshparvar, Dianne Taylor, Thomas O'Leary, Hamidreza Rahmani, Fatemeh Abbasiyeganeh, Michael Previs, and Kenneth Taylor  
DOI: 10.26508/lsa/202000823

*Corresponding author(s): Prof. Kenneth A. Taylor (Institute of Molecular Biophysics, Florida State University)*

---

### Review timeline:

---

|                     |            |
|---------------------|------------|
| Submission Date:    | 2020-06-22 |
| Editorial Decision: | 2020-06-24 |
| Revision Received:  | 2020-06-26 |
| Editorial Decision: | 2020-06-29 |
| Revision Received:  | 2020-06-30 |
| Accepted:           | 2020-06-30 |

---

### Transaction Report:

(Note: With the exception of the correction of typographical or spelling errors that could be a source of ambiguity, letters and reports are not edited. The original formatting of letters and referee reports may not be reflected in this compilation.)

No Peer Review Process File is available with this article, as the authors have chosen not to make the review process public in this case.

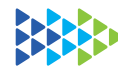

RE: Life Science Alliance Manuscript #LSA-2020-00823-T

Prof Kenneth A. Taylor  
Florida State University  
Institute for Molecular Biophysics  
Off Chieftain Way  
Tallahassee, FL 32306-4380

Dear Dr. Taylor,

Thank you for submitting your revised manuscript entitled "CryoEM Structure of Drosophila Flight Muscle Thick Filaments at 7Å Resolution". We would be happy to publish your paper in Life Science Alliance pending final revisions necessary to meet our formatting guidelines.

- please have all corresponding authors add their ORCID ID - you should have received instructions on how to do so
- please add all required information to our system (summary blurb, category, author contributions, etc.)
- please add a conflict of interest statement to the main manuscript text
- please add all figures in separate files, including the main figures and the supplementary figures (for more information on figure formatting, please look at our author guidelines)
- please add your figure legends for main figures, supp. Figures, and movies to the main manuscript text
- please provide your manuscript and tables in editable docx or excel format versions
- please list 10 authors and et al. in the reference list
- please take a look at your figure callouts once more - on page 11, there is a callout for Figure 5, but the manuscript does not have a Figure 5
- Please add information on p-values and number of replicates in the figure legends where appropriate
- Please limit keywords to maximally five
- please consult our Manuscript Preparation Author Guidelines and follow the instructions of how the sections of your manuscript should be divided
- Remove separate 'Statement of Significance' and 'Conclusions' paragraphs.
- Rename 'Data depositions' section to 'Data availability' and update the accession codes.
- Introduce a separate 'Statistical Analysis' paragraph within the Material and Methods.

If you are planning a press release on your work, please inform us immediately to allow informing our production team and scheduling a release date.

To upload the final version of your manuscript, please log in to your account:  
<https://lsa.msubmit.net/cgi-bin/main.plex>  
You will be guided to complete the submission of your revised manuscript and to fill in all necessary information. Please get in touch in case you do not know or remember your login name.

To avoid unnecessary delays in the acceptance and publication of your paper, please read the following information carefully.



#### A. FINAL FILES:

These items are required for acceptance.

-- An editable version of the final text (.DOC or .DOCX) is needed for copyediting (no PDFs).

-- High-resolution figure, supplementary figure and video files uploaded as individual files: See our detailed guidelines for preparing your production-ready images, <http://www.life-science-alliance.org/authors>

-- Summary blurb (enter in submission system): A short text summarizing in a single sentence the study (max. 200 characters including spaces). This text is used in conjunction with the titles of papers, hence should be informative and complementary to the title. It should describe the context and significance of the findings for a general readership; it should be written in the present tense and refer to the work in the third person. Author names should not be mentioned.

#### B. MANUSCRIPT ORGANIZATION AND FORMATTING:

Full guidelines are available on our Instructions for Authors page, <http://www.life-science-alliance.org/authors>

We encourage our authors to provide original source data, particularly uncropped/-processed electrophoretic blots and spreadsheets for the main figures of the manuscript. If you would like to add source data, we would welcome one PDF/Excel-file per figure for this information. These files will be linked online as supplementary "Source Data" files.

**\*\*Submission of a paper that does not conform to Life Science Alliance guidelines will delay the acceptance of your manuscript.\*\***

**\*\*It is Life Science Alliance policy that if requested, original data images must be made available to the editors. Failure to provide original images upon request will result in unavoidable delays in publication. Please ensure that you have access to all original data images prior to final submission.\*\***

**\*\*The license to publish form must be signed before your manuscript can be sent to production. A link to the electronic license to publish form will be sent to the corresponding author only. Please take a moment to check your funder requirements.\*\***

**\*\*Reviews, decision letters, and point-by-point responses associated with peer-review at Life Science Alliance will be published online, alongside the manuscript. If you do want to opt out of having the reviewer reports and your point-by-point responses displayed, please let us know immediately.\*\***

Thank you for your attention to these final processing requirements. Please revise and format the manuscript and upload materials within 7 days.

Thank you for this interesting contribution, we look forward to publishing your paper in Life Science Alliance.

Sincerely,



Reilly Lorenz  
Editorial Office Life Science Alliance  
Meyerhofstr. 1  
69117 Heidelberg, Germany  
t +49 6221 8891 414  
e [contact@life-science-alliance.org](mailto:contact@life-science-alliance.org)  
[www.life-science-alliance.org](http://www.life-science-alliance.org)

---



RE: Life Science Alliance Manuscript #LSA-2020-00823-TR

Prof. Kenneth A. Taylor  
Florida State University  
Institute of Molecular Biophysics  
91 Chieftan Way  
Tallahassee, FL 32306-4380  
United States

Dear Dr. Taylor,

Thank you for submitting your revised manuscript entitled "CryoEM Structure of Drosophila Flight Muscle Thick Filaments at 7Å Resolution". We would be happy to publish your paper in Life Science Alliance pending final revisions necessary to meet our formatting guidelines.

-please add the figure legends for Supplementary Figures, table legends, and movies to the main manuscript text

If you are planning a press release on your work, please inform us immediately to allow informing our production team and scheduling a release date.

To upload the final version of your manuscript, please log in to your account:

<https://lsa.msubmit.net/cgi-bin/main.plex>

You will be guided to complete the submission of your revised manuscript and to fill in all necessary information. Please get in touch in case you do not know or remember your login name.

To avoid unnecessary delays in the acceptance and publication of your paper, please read the following information carefully.

#### A. FINAL FILES:

These items are required for acceptance.

-- An editable version of the final text (.DOC or .DOCX) is needed for copyediting (no PDFs).

-- High-resolution figure, supplementary figure and video files uploaded as individual files: See our detailed guidelines for preparing your production-ready images, <http://www.life-science-alliance.org/authors>

-- Summary blurb (enter in submission system): A short text summarizing in a single sentence the study (max. 200 characters including spaces). This text is used in conjunction with the titles of papers, hence should be informative and complementary to the title. It should describe the context and significance of the findings for a general readership; it should be written in the present tense and refer to the work in the third person. Author names should not be mentioned.

#### B. MANUSCRIPT ORGANIZATION AND FORMATTING:

Full guidelines are available on our Instructions for Authors page, <http://www.life-science-alliance.org/authors>



We encourage our authors to provide original source data, particularly uncropped/-processed electrophoretic blots and spreadsheets for the main figures of the manuscript. If you would like to add source data, we would welcome one PDF/Excel-file per figure for this information. These files will be linked online as supplementary "Source Data" files.

**\*\*Submission of a paper that does not conform to Life Science Alliance guidelines will delay the acceptance of your manuscript.\*\***

**\*\*It is Life Science Alliance policy that if requested, original data images must be made available to the editors. Failure to provide original images upon request will result in unavoidable delays in publication. Please ensure that you have access to all original data images prior to final submission.\*\***

**\*\*The license to publish form must be signed before your manuscript can be sent to production. A link to the electronic license to publish form will be sent to the corresponding author only. Please take a moment to check your funder requirements.\*\***

**\*\*Reviews, decision letters, and point-by-point responses associated with peer-review at Life Science Alliance will be published online, alongside the manuscript. If you do want to opt out of having the reviewer reports and your point-by-point responses displayed, please let us know immediately.\*\***

Thank you for your attention to these final processing requirements. Please revise and format the manuscript and upload materials within 7 days.

Thank you for this interesting contribution, we look forward to publishing your paper in Life Science Alliance.

Sincerely,

Reilly Lorenz  
Editorial Office Life Science Alliance  
Meyershofstr. 1  
69117 Heidelberg, Germany  
t +49 6221 8891 414  
e [contact@life-science-alliance.org](mailto:contact@life-science-alliance.org)  
[www.life-science-alliance.org](http://www.life-science-alliance.org)

-----



RE: Life Science Alliance Manuscript #LSA-2020-00823-TRRR

Prof Kenneth A. Taylor  
Florida State University  
Institute for Molecular Biophysics  
Off Chieftain Way  
Tallahassee, FL 32306-4380

Dear Dr. Taylor,

Thank you for submitting your Research Article entitled "CryoEM Structure of Drosophila Flight Muscle Thick Filaments at 7Å Resolution". It is a pleasure to let you know that your manuscript is now accepted for publication in Life Science Alliance. Congratulations on this interesting work.

The final published version of your manuscript will be deposited by us to PubMed Central upon online publication.

Your manuscript will now progress through copyediting and proofing. It is journal policy that authors provide original data upon request.

Reviews, decision letters, and point-by-point responses associated with peer-review at Life Science Alliance will be published online, alongside the manuscript. If you do want to opt out of having the reviewer reports and your point-by-point responses displayed, please let us know immediately.

\*\*\*IMPORTANT: If you will be unreachable at any time, please provide us with the email address of an alternate author. Failure to respond to routine queries may lead to unavoidable delays in publication.\*\*\*

Scheduling details will be available from our production department. You will receive proofs shortly before the publication date. Only essential corrections can be made at the proof stage so if there are any minor final changes you wish to make to the manuscript, please let the journal office know now.

#### DISTRIBUTION OF MATERIALS:

Authors are required to distribute freely any materials used in experiments published in Life Science Alliance. Authors are encouraged to deposit materials used in their studies to the appropriate repositories for distribution to researchers.

You can contact the journal office with any questions, [contact@life-science-alliance.org](mailto:contact@life-science-alliance.org)

Again, congratulations on a very nice paper. I hope you found the review process to be constructive and are pleased with how the manuscript was handled editorially. We look forward to future exciting submissions from your lab.

Sincerely,

Reilly Lorenz  
Editorial Office Life Science Alliance  
Meyerhofstr. 1  
69117 Heidelberg, Germany



t +49 6221 8891 414  
e [contact@life-science-alliance.org](mailto:contact@life-science-alliance.org)  
[www.life-science-alliance.org](http://www.life-science-alliance.org)
